# Supplementary material for: Impact of Processing Method and Storage Time on Phytochemical Concentrations in an Antioxidant-Rich Food Mixture
Source: MDPI journal article supplement (doi:10.3390/antiox12061252), 2023-06-10
Supplement: s1 [file s1]

Supplementary Materials –Figures:

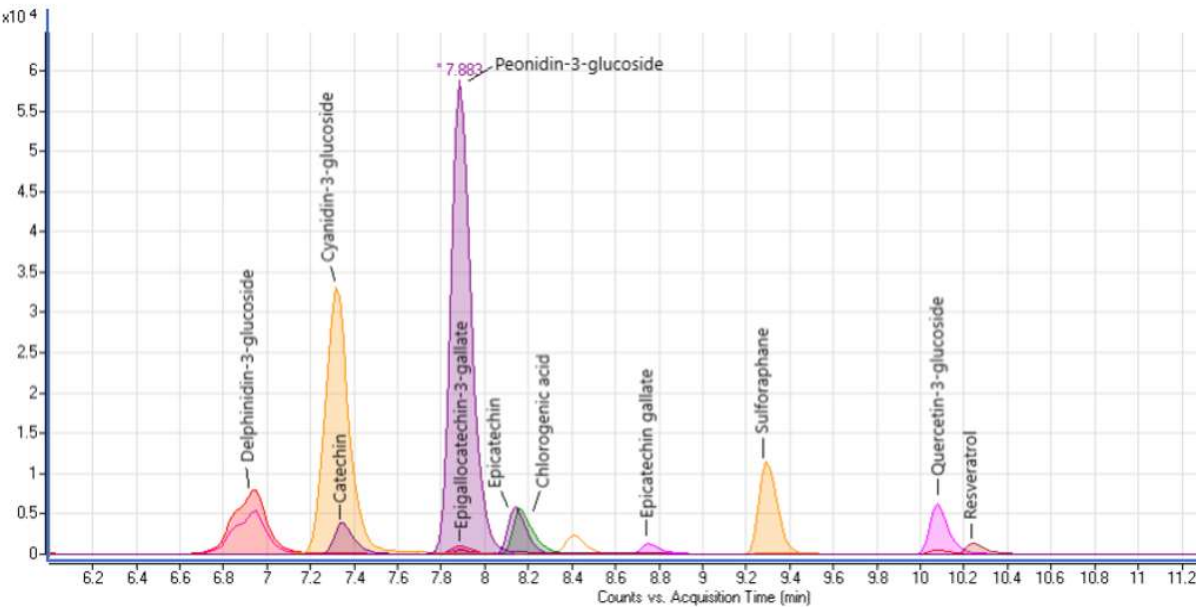

Figure S1: Example chromatogram of standard LC-MS/MS

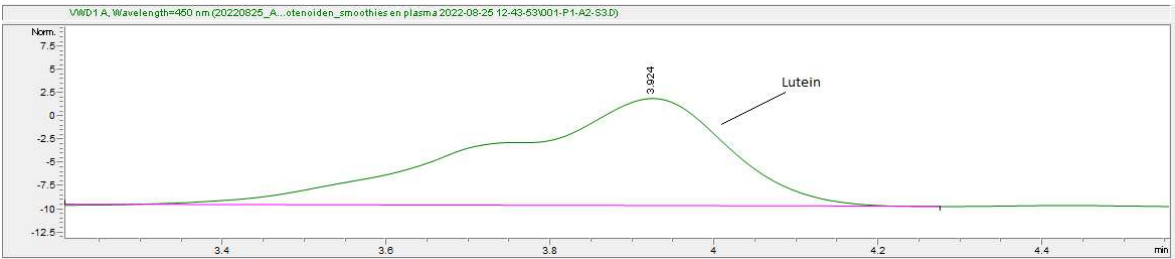

Figure S2: Example chromatogram of standard lutein UV (450 nm)

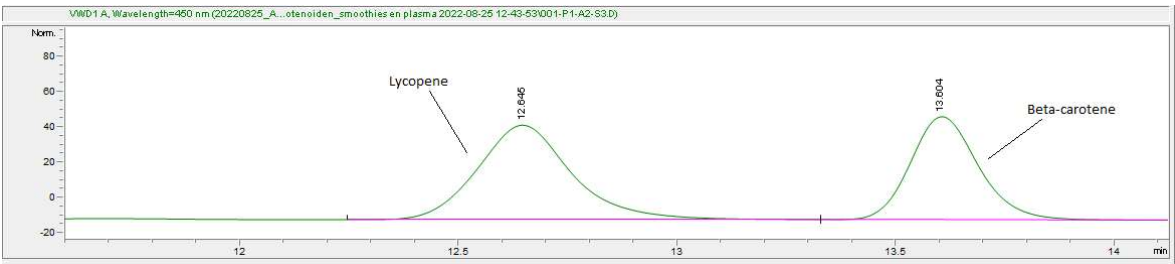

Figure S3: Example chromatogram of standard lycopene and beta-carotene UV (450 nm)

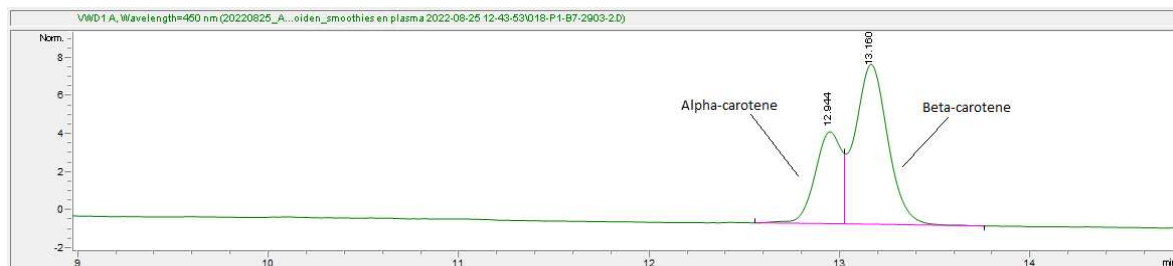

Figure S4: Example chromatogram of sample UV (450 nm)

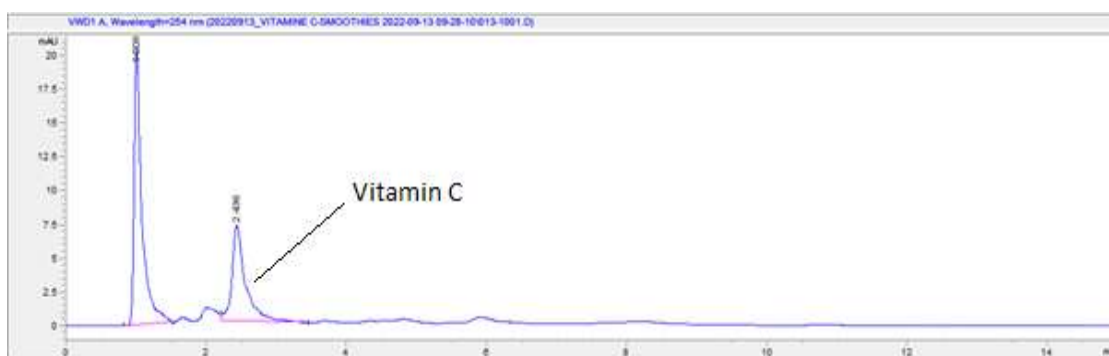

Figure S5: Example chromatogram of sample UV (254 nm)
