# Supplementary material for: Impact of Processing Method and Storage Time on Phytochemical Concentrations in an Antioxidant-Rich Food Mixture
Source: MDPI journal article supplement (doi:10.3390/antiox12061252), 2023-06-10
Supplement: s1 [file s1]

## Supplementary Materials –Tables:

*LC-MS/MS method for polyphenols:*

Table S1: System parameters

|                         |                                   |
|-------------------------|-----------------------------------|
| Instrument LC:          | LC-MS/MS                          |
| Column:                 | C18 2,5µm (4,6 mm x 150 mm)       |
| Flow:                   | 0.75 mL/min                       |
| Stop time:              | 20 min                            |
| Post time:              | 0 min                             |
| Injection volume:       | 10 µL                             |
| Column temperature:     | 45 °C                             |
| Sampler temperature:    | 15 °C                             |
| UV Detector:            | 280 nm                            |
| Ionization mode:        | ESI                               |
| Gas temperature:        | 300 °C                            |
| Gas flow:               | 10 L/min                          |
| Sheath gas temperature: | 350 °C                            |
| Sheath gas flow:        | 11 L/min                          |
| Capillary voltage:      | 3500 V                            |
| VCharging:              | 500                               |
| Detection mode:         | MRM                               |
| Mobile phase A:         | 1% formic acid in ULC-MS water    |
| Mobile phase B:         | 1% formic acid in ULC-MS methanol |

Table S2: Gradient LC

| Time (min) | Mobile phase (v/v %) |     |
|------------|----------------------|-----|
|            | A                    | B   |
| 0          | 95                   | 5   |
| 2.0        | 95                   | 5   |
| 13.0       | 0                    | 100 |
| 15.0       | 0                    | 100 |
| 16.0       | 95                   | 5   |
| 20.0       | 95                   | 5   |

Table S3: LCMS parameters

| Compound                     | Precursor ion | Product ion | Dwell time (ms) | Frag (V) | CE (V) | CA (V) | Polarity |
|------------------------------|---------------|-------------|-----------------|----------|--------|--------|----------|
| Delphinidin-3-glucoside      | 465.4         | 303         | 50              | 149      | 24     | 4      | Positive |
| Delphinidin-3-glucoside      | 465.4         | 229         | 50              | 149      | 50     | 4      | Positive |
| Cyanidin-3-glucoside         | 449.4         | 287.1       | 50              | 148      | 20     | 4      | Positive |
| Cyanidin-3-glucoside         | 449.4         | 137.1       | 50              | 148      | 50     | 4      | Positive |
| Catechin/Epicatechin         | 291.3         | 139         | 50              | 97       | 12     | 4      | Positive |
| Catechin/Epicatechin         | 291.3         | 123         | 50              | 97       | 32     | 4      | Positive |
| Peonidin-3-glucoside         | 463.4         | 301.1       | 50              | 128      | 20     | 4      | Positive |
| Peonidin-3-glucoside         | 463.4         | 286         | 50              | 128      | 48     | 4      | Positive |
| Epigallocatechin-3-glucoside | 459.4         | 151.2       | 50              | 118      | 8      | 4      | Positive |
| Epigallocatechin-3-glucoside | 459.4         | 139.1       | 50              | 118      | 24     | 4      | Positive |
| Chlorogenic acid             | 355.3         | 163.1       | 50              | 82       | 12     | 4      | Positive |
| Chlorogenic acid             | 355.3         | 135         | 50              | 82       | 40     | 4      | Positive |
| Epicatechin gallate          | 443.4         | 139.2       | 50              | 108      | 28     | 4      | Positive |
| Epicatechin gallate          | 443.4         | 123         | 50              | 108      | 24     | 4      | Positive |
| Sulforaphane                 | 178.3         | 114.1       | 50              | 97       | 8      | 4      | Positive |
| Sulforaphane                 | 178.3         | 72          | 50              | 97       | 32     | 4      | Positive |
| Quercetin-3-glucoside        | 465.4         | 303.1       | 50              | 103      | 8      | 4      | Positive |
| Quercetin-3-glucoside        | 465.4         | 85          | 50              | 103      | 28     | 4      | Positive |
| Resveratrol                  | 229.2         | 135         | 50              | 103      | 12     | 4      | Positive |

Table S4: Compound table with indicative retention times

| Compound                   | Retention time – indicative (min) |
|----------------------------|-----------------------------------|
| Delphinidin-3-glucoside    | 7.0                               |
| Cyanidin-3-glucoside       | 7.4                               |
| Catechin                   | 7.4                               |
| Peonidin-3-glucoside       | 7.9                               |
| Epigallocatechin-3-gallate | 7.9                               |
| Epicatechin                | 8.2                               |
| Chlorogenic acid           | 8.2                               |
| Epicatechin gallate        | 8.8                               |
| Sulforaphane               | 9.3                               |
| Quercetin-3-glucoside      | 10.1                              |

|             |      |
|-------------|------|
| Resveratrol | 10.3 |
|-------------|------|

LC-UV method for carotenoids:

Table S5: System parameters

|                      |                                   |
|----------------------|-----------------------------------|
| Instrument LC:       | LC-UV                             |
| Column:              | C18 2.5 µm (3.0 mm x 150 mm)      |
| Flow:                | 0.5 ml/min                        |
| Stop time:           | 28 min                            |
| Post time:           | 0 min                             |
| Injection volume:    | 5µL                               |
| Temperature sampler: | 15 °C                             |
| Temperature oven:    | 40 °C                             |
| UV detector:         | 450 nm                            |
| Mobile phase A:      | 97.5% methanol, 2.5% ULC-MS water |
| Mobile phase B:      | 100% Isopropyl alcohol            |

Table S6: Gradient LC

| Time (min) | Mobile phase (v/v %) |     |
|------------|----------------------|-----|
|            | A                    | B   |
| 0          | 100                  | 0   |
| 3.0        | 100                  | 0   |
| 14.0       | 25                   | 75  |
| 17.0       | 0                    | 100 |
| 20.0       | 0                    | 100 |
| 22.0       | 100                  | 0   |
| 28.0       | 100                  | 0   |

Table S7: Compound table with indicative retention times

| Compound       | Retention time – indicative (min) |
|----------------|-----------------------------------|
| Lutein         | 3.4                               |
| Lycopene       | 12.6                              |
| Alpha-carotene | 13.5                              |
| Beta-carotene  | 13.6                              |

*LC-UV method for vitamin C:*

Table S8: System parameters

|                      |                                      |
|----------------------|--------------------------------------|
| Instrument LC:       | LC-UV                                |
| Column:              | C <sub>18</sub> T3 3µm, 4.6 x 150 mm |
| Flow:                | 0.5 ml/min                           |
| Stop time:           | 15 min                               |
| Post time:           | 0 min                                |
| Injection volume:    | 5µL                                  |
| Temperature sampler: | 15 °C                                |
| Temperature oven:    | 20 °C                                |
| UV detector:         | 254 nm                               |
| Gradient:            | Isocratic                            |
| Mobile phase         | 0.05% formic acid in ULC-MS water    |

Table S9: Raw Data Overview

## A1. Polyphenol Measurements

| t0      |           | c. (mg/kg)              |                      |          |                      |                            |             |                  |                     |              |                       |             |
|---------|-----------|-------------------------|----------------------|----------|----------------------|----------------------------|-------------|------------------|---------------------|--------------|-----------------------|-------------|
| Naam    | BL-nummer | Delphinidin-3-glucoside | Cyanidin-3-glucoside | Catechin | Peonidin-3-glucoside | Epigallocatechin-3-gallate | Epicatechin | Chlorogenic acid | Epicatechin gallate | Sulforaphane | Quercetin-3-glucoside | Resveratrol |
| Pas-k   | 2950-1    | 3.326112                | 28.59499             | 0.337752 | 1.158937             | 1.324091                   | 0.910097    | 1.788841         | 0.451935            | 1.555873     | 4.108685              | 0.046687    |
| Pas-k   | 2950-2    | 3.296751                | 29.90546             | 0.304295 | 1.144568             | 1.258205                   | 0.780353    | 1.681147         | 0.464693            | 1.539565     | 4.15798               | 0.032541    |
| Pas-k   | 2950-3    | 3.212982                | 30.44242             | 0.31563  | 1.227824             | 1.290723                   | 0.782       | 1.723959         | 0.462778            | 1.562252     | 4.181563              | 0.041918    |
| Pst-k   | 2938-1    | 5.774619                | 31.33584             | 1.111834 | 1.097067             | 4.823085                   | 3.520709    | 13.52332         | 1.032095            | 1.284252     | 4.927313              | 0.026725    |
| Pst-k   | 2938-2    | 5.765444                | 30.45652             | 1.03901  | 1.118639             | 5.002411                   | 3.626918    | 14.26237         | 1.119693            | 1.307593     | 5.037793              | 0.026486    |
| Pst-k   | 2938-3    | 6.413337                | 34.20742             | 1.207328 | 1.154587             | 5.056879                   | 3.95822     | 14.68234         | 1.13451             | 1.369659     | 5.26847               | 0.027611    |
| o-k     | 2942-1    | 4.535947                | 30.75845             | 0.527371 | 1.251873             | 2.319057                   | 1.667127    | 5.067288         | 0.565963            | 1.514324     | 3.37845               | 0.059363    |
| o-k     | 2942-2    | 4.436938                | 31.44049             | 0.538857 | 1.171275             | 2.27238                    | 1.486087    | 4.873496         | 0.533374            | 1.41729      | 3.307029              | 0.018579    |
| o-k     | 2942-3    | 4.49108                 | 31.20294             | 0.518183 | 1.14252              | 2.234021                   | 1.629351    | 4.806855         | 0.560568            | 1.532221     | 3.536794              | 0.02404     |
| Pas-v 1 | 2951-1    | 8.136392                | 40.42552             | 0.591716 | 1.279988             | 4.028006                   | 1.466904    | 5.665171         | 1.165999            | 1.431855     | 5.513425              | 0.016809    |
| Pas-v 1 | 2951-2    | 7.29325                 | 38.85501             | 0.557892 | 1.439365             | 4.121074                   | 1.705018    | 5.73285          | 1.212252            | 1.466007     | 5.350382              | 0.02554     |
| Pas-v 1 | 2951-3    | 7.790111                | 42.142               | 0.619673 | 1.399441             | 4.003325                   | 1.646758    | 5.850506         | 1.247342            | 1.464756     | 5.629246              | 0.040828    |
| Pst-v 1 | 2939-1    | 5.494203                | 32.27339             | 1.177736 | 1.141303             | 5.582181                   | 4.12913     | 12.64487         | 1.209776            | 1.214823     | 4.592741              | 0.037696    |
| Pst-v 1 | 2939-2    | 5.414909                | 31.46356             | 1.102753 | 1.153961             | 5.555918                   | 3.973406    | 12.74626         | 1.191902            | 1.201838     | 4.223755              | 0.03853     |
| Pst-v 1 | 2939-3    | 5.795974                | 32.86476             | 1.133587 | 1.14406              | 5.555394                   | 3.859585    | 12.31941         | 1.184226            | 1.228432     | 4.266781              | 0.033768    |
| o-v 1   | 2943-1    | 4.268446                | 29.01951             | 0.476157 | 1.162079             | 3.173914                   | 1.328617    | 5.526311         | 1.044055            | 1.268287     | 4.583451              | 0.014981    |
| o-v 1   | 2943-2    | 6.341315                | 38.08226             | 0.578718 | 1.378189             | 4.187413                   | 1.715498    | 6.415796         | 1.055756            | 1.447958     | 5.192672              | 0.016937    |

|               |        |          |              |              |              |          |              |          |              |          |              |              |
|---------------|--------|----------|--------------|--------------|--------------|----------|--------------|----------|--------------|----------|--------------|--------------|
| o-v 1         | 2943-3 | 6.55719  | 39.139<br>88 | 0.6290<br>04 | 1.4457<br>12 | 4.537789 | 1.9772       | 6.899347 | 1.16957<br>5 | 1.466418 | 5.30568<br>9 | 0.02149<br>7 |
| bramen        | 2899-1 | 0.120137 | 182.47<br>87 | 0.1445<br>75 | 0.4199<br>98 | 0.08049  | 6.00077<br>7 | 0.341085 | 0.01954<br>2 | 0.000252 | 3.62423<br>6 | 0.00610<br>8 |
| bramen        | 2899-2 | 0.064182 | 203.29<br>43 | 0.1681<br>75 | 0.4744<br>97 | 0.031817 | 6.69808      | 0.244498 | 0.02030<br>2 | 0.00011  | 4.3418       | 0.01183<br>5 |
| bramen        | 2899-3 | 0.032173 | 190.17<br>98 | 0.1602<br>53 | 0.4117<br>21 | 0.024269 | 6.43154<br>8 | 0.226417 | 0.01280<br>3 | 0.000149 | 3.54381<br>7 | 0.00739<br>9 |
| appel         | 2895-1 | 0.016935 | 20.091<br>98 | 0.5800<br>97 | 0.0259<br>86 | 0.012698 | 6.62300<br>6 | 15.93164 | #VALUE!<br>! | 0        | 31.1878<br>6 | 0.01507<br>6 |
| appel         | 2895-2 | 0.011661 | 17.036<br>8  | 0.6382<br>26 | 0.0322<br>45 | 0.012641 | 7.96952<br>1 | 19.27321 | #VALUE!<br>! | 0        | 34.6523<br>7 | 0.01993<br>5 |
| appel         | 2895-3 | 0.010472 | 18.520<br>09 | 0.7242<br>95 | 0.0292<br>02 | 0.005176 | 7.60357<br>7 | 18.71439 | #VALUE!<br>! | 0.000103 | 30.9082<br>1 | 0.03589<br>9 |
| blauwe bessen | 2901-1 | 137.2167 | 23.115<br>45 | 3.0839<br>17 | 3.9840<br>82 | 0.003913 | 0.15267<br>4 | 73.77097 | 0.00421<br>6 | 0.000209 | 31.7292<br>8 | 0.00413<br>2 |
| blauwe bessen | 2901-2 | 147.7995 | 26.335<br>64 | 2.4531<br>46 | 5.1009<br>46 | #VALUE!  | 0.17722      | 82.38963 | 0.00483<br>6 | 0        | 39.7380<br>6 | 0.02138<br>1 |
| blauwe bessen | 2901-3 | 118.4583 | 21.308<br>72 | 2.4536<br>23 | 4.2014<br>35 | #VALUE!  | 0.17083<br>1 | 70.35062 | 0.00681<br>9 | 0        | 30.5383<br>4 | 0.01283<br>5 |
| druiven       | 2894-1 | 37.75798 | 13.797<br>86 | 0.4768<br>07 | 13.430<br>14 | 0.016764 | 0.37317<br>4 | 1.585265 | 0.09994<br>4 | 0.000134 | 16.5018<br>6 | 0.79872<br>3 |
| druiven       | 2894-2 | 35.97381 | 13.188<br>23 | 1.5945<br>44 | 13.684<br>84 | 0.017904 | 0.84928<br>3 | 0.616142 | 0.22095<br>1 | 0        | 16.4153<br>4 | 0.58088<br>1 |
| druiven       | 2894-3 | 34.67729 | 13.501<br>95 | 0.5775<br>25 | 14.004<br>49 | 0.010293 | 0.43324<br>9 | 0.3555   | 0.10245      | 0        | 17.7644<br>2 | 0.66768<br>2 |
| framboos      | 2898-1 | 0.32368  | 28.150<br>33 | 0.3106       | 0.0517<br>56 | 0.005715 | 7.34586<br>6 | 0.151101 | 0.03912<br>1 | 0.000224 | 1.93721<br>2 | 0.0129       |
| framboos      | 2898-2 | 0.248459 | 31.555<br>78 | 0.2075<br>39 | 0.0534<br>1  | 0.004348 | 5.62957<br>1 | 0.127531 | 0.02140<br>5 | 0.000158 | 1.87761<br>3 | 0.00280<br>5 |
| framboos      | 2898-3 | 0.225853 | 30.906<br>82 | 0.1655<br>36 | 0.0548<br>54 | 0.004717 | 4.60492<br>6 | 0.121127 | 0.01625<br>6 | 7.61E-05 | 1.45698<br>5 | 0.01271      |
| bloemkool     | 2900-1 | 0.096023 | 0.4998<br>71 | 0.0100<br>51 | 0.0030<br>95 | #VALUE!  | 0.01728<br>8 | 0.10829  | #VALUE!<br>! | 0.347189 | 0.01751<br>6 | 0.00613<br>4 |
| bloemkool     | 2900-2 | 0.108327 | 0.2352<br>83 | 0.0077<br>57 | 0.0033<br>69 | #VALUE!  | 0.00788      | 0.106168 | #VALUE!<br>! | 0.382364 | 0.01152<br>2 | 0.00611<br>7 |
| bloemkool     | 2900-3 | 0.074634 | 0.1625<br>74 | 0.0054<br>73 | 0.0028<br>71 | #VALUE!  | 0.00661      | 0.098846 | #VALUE!<br>! | 0.379373 | 0.00914<br>9 | 0.00318<br>8 |
| spruiten      | 2893-1 | #VALUE!  | 0.1528<br>23 | 0.0034       | 0.0016<br>23 | #VALUE!  | 0.00701      | 3.424832 | 0.00531<br>9 | 0.005231 | 0.00883<br>8 | 0.01451<br>9 |
| spruiten      | 2893-2 | 0.00964  | 0.1283<br>22 | 0.0055<br>53 | 0.0017<br>03 | #VALUE!  | 0.0022       | 3.079798 | 0.00302<br>7 | 0.005475 | 0.00756<br>2 | 0.00995<br>2 |

|                               |        |          |          |          |          |          |          |          |          |          |          |          |
|-------------------------------|--------|----------|----------|----------|----------|----------|----------|----------|----------|----------|----------|----------|
| spruiten                      | 2893-3 | 0        | 0.104122 | 0.004207 | 0.001222 | #VALUE!  | 0.003731 | 3.808507 | 0.010954 | 0.007364 | 0.009717 | 0.008159 |
| tomaat                        | 2896-1 | 0.05609  | 0.104793 | 0.006932 | 0.001382 | #VALUE!  | 0.002475 | 11.35355 | 0.009944 | 6.61E-05 | 0.583577 | 0.023997 |
| tomaat                        | 2896-2 | 0.010613 | 0.03123  | 0.005268 | 0.000821 | #VALUE!  | #VALUE!  | 13.07515 | 0        | 0.000114 | 0.580531 | 0.024688 |
| tomaat                        | 2896-3 | 0.007211 | 0.030007 | 0.007978 | 0.000656 | #VALUE!  | 0.003084 | 13.00476 | 0        | 7.34E-05 | 0.767166 | 0.022411 |
| broccoli                      | 2897-1 | #VALUE!  | 0.022137 | 0.002948 | 0.000477 | #VALUE!  | 0.002121 | 2.353087 | #VALUE!  | 0.085389 | 0.06682  | 0.007609 |
| broccoli                      | 2897-2 | #VALUE!  | 0.045901 | 0.002097 | 0.000506 | #VALUE!  | 0.001232 | 2.066943 | 0.001721 | 0.0797   | 0.032161 | 0.006784 |
| broccoli                      | 2897-3 | #VALUE!  | 0.047726 | 0.001626 | 0.000449 | #VALUE!  | 0.00148  | 1.722623 | #VALUE!  | 0.073134 | 0.043682 | 0.007618 |
| wortel                        | 2903-1 | 0.00428  | 0.021466 | 0.001609 | 0.000268 | #VALUE!  | 0.002447 | 31.67324 | 0        | 0.000172 | 0.00259  | 0.005364 |
| wortel                        | 2903-2 | 0.005466 | 0.02242  | 0.002856 | 0.000229 | #VALUE!  | 0.001322 | 33.3936  | 0        | 0.000199 | 0.001728 | 0.018815 |
| wortel                        | 2903-3 | 0.004684 | 0.019664 | 0.002978 | 0.000318 | #VALUE!  | 0.001167 | 30.30897 | 0        | 0.000241 | 0.001806 | 0.003563 |
| paprika                       | 2902-1 | 0.005938 | 0.065973 | 0.002235 | 0.00042  | #VALUE!  | 0.011374 | 0.994171 | 0.002994 | 0.000318 | 0.135384 | 0.326104 |
| paprika                       | 2902-2 | 0.006848 | 0.068685 | 0.005048 | 0.000415 | #VALUE!  | 0.013461 | 0.436657 | 0.00268  | 0.000514 | 0.144785 | 0.340414 |
| paprika                       | 2902-3 | 0.005961 | 0.06661  | 0.003117 | 0.00045  | #VALUE!  | 0.013187 | 0.203186 | 0        | 0.000669 | 0.142342 | 0.304559 |
| ECP naturel 1                 | 3126-1 | 0.014627 | 0.119331 | 0.17741  | 0.002142 | #VALUE!  | 0.037003 | 10.050   | #VALUE!  | 0.005748 | 0.009991 | 0.104291 |
| ECP naturel 1                 | 3126-2 | #VALUE!  | 0.136538 | 0.186692 | 0.001805 | #VALUE!  | 0.034314 | 10.361   | #VALUE!  | 0.002932 | 0.011861 | 0.120861 |
| ECP naturel 1                 | 3126-3 | 0.035875 | 0.160784 | 0.161513 | 0.001508 | #VALUE!  | 0.031048 | 9.416    | #VALUE!  | 0.002807 | 0.00787  | 0.12204  |
| ECP VFMX 100 - 400 06-07-22 1 | 3128-1 | 7.346422 | 69.12734 | 2.486538 | 2.05853  | 9.112052 | 6.779136 | 28.737   | 2.326137 | 3.0115   | 14.68286 | 0.232194 |
| ECP VFMX 100 - 400 06-07-22 2 | 3128-2 | 7.342972 | 69.35131 | 2.269881 | 1.993943 | 9.689073 | 6.149262 | 29.595   | 2.450683 | 2.865128 | 14.66676 | 0.132163 |
| ECP VFMX 100 - 400 06-07-22 3 | 3128-3 | 7.934349 | 80.11364 | 2.740699 | 2.419714 | 10.58852 | 8.485271 | 30.636   | 2.668667 | 3.220981 | 16.05532 | 0.268645 |
| Mifood blends 2019 1          | 2905-1 | 0.014772 | 0.128516 | 0.725845 | 0.004535 | 0.035103 | 3.090928 | 14.85357 | 0.01325  | 0.000477 | 3.605711 | 0.026008 |
| Mifood blends 2019 1          | 2905-2 | 0.004328 | 0.047342 | 0.611758 | 0.002829 | 0.016067 | 2.613037 | 14.48907 | 0.007505 | 0.009038 | 3.61274  | 0.016596 |

|                      |        |          |          |          |          |          |          |          |          |          |          |          |
|----------------------|--------|----------|----------|----------|----------|----------|----------|----------|----------|----------|----------|----------|
| Mifood blends 2019 1 | 2905-3 | 0.006143 | 0.046155 | 0.633391 | 0.005257 | 0.013244 | 2.775351 | 14.54317 | 0.008438 | 0.100491 | 3.814797 | 0.024508 |
| Mifood blends 2019 2 | 2906-1 | 53.5113  | 107.573  | 11.23849 | 12.52929 | 0.040388 | 6.975248 | 12.58806 | 0.873125 | 0.001983 | 18.4948  | 0.448377 |
| Mifood blends 2019 2 | 2906-2 | 46.82427 | 100.0025 | 10.70873 | 11.6231  | 0.056759 | 6.889941 | 12.23124 | 0.845299 | 0.002065 | 17.77864 | 0.463638 |
| Mifood blends 2019 2 | 2906-3 | 52.0294  | 109.8084 | 11.13362 | 12.54659 | 0.059567 | 6.78798  | 12.58056 | 0.826842 | 0.003184 | 18.23011 | 0.440301 |
| Mifood blends 2019 3 | 2907-1 | 0.315924 | 1.735295 | 0.066572 | 0.032591 | #VALUE!  | 0.03342  | 23.46223 | 0.011198 | 5.1E-05  | 0.390731 | 0.074757 |
| Mifood blends 2019 3 | 2907-2 | 0.107738 | 0.486793 | 0.02007  | 0.007542 | 0.005998 | 0.012964 | 24.14099 | 0.00687  | 0.003997 | 0.334595 | 0.084643 |
| Mifood blends 2019 3 | 2907-3 | 0.068975 | 0.283564 | 0.013601 | 0.006443 | 0.003642 | 0.008546 | 24.21738 | 0.010646 | 0.010064 | 0.329009 | 0.095954 |
| Mifood blends 2019 4 | 2908-1 | 0.065506 | 0.15088  | 0.008735 | 0.003892 | #VALUE!  | 0.004993 | 0.828186 | 0.003003 | 1.747357 | 0.023629 | 0.011754 |
| Mifood blends 2019 4 | 2908-2 | 0.042909 | 0.127713 | 0.005519 | 0.003217 | #VALUE!  | 0.005625 | 0.359783 | #VALUE!  | 1.923086 | 0.026489 | 0.026159 |
| Mifood blends 2019 4 | 2908-3 | 0.032004 | 0.085564 | 0.006732 | 0.002478 | #VALUE!  | 0.005585 | 0.473465 | #VALUE!  | 2.052813 | 0.025013 | 0.039887 |
| Mifood blends 2019 5 | 2909-1 | 25.26774 | 78.40439 | 9.215161 | 8.735965 | 2.858845 | 7.292129 | 24.60394 | 1.512008 | 0.00037  | 15.32951 | 0.276226 |
| Mifood blends 2019 5 | 2909-2 | 23.07466 | 73.9193  | 9.811287 | 8.065417 | 2.722722 | 7.780573 | 23.49195 | 1.418413 | 0.000547 | 13.83596 | 0.215559 |
| Mifood blends 2019 5 | 2909-3 | 22.46387 | 75.86414 | 9.353112 | 8.539997 | 2.737505 | 6.427243 | 21.09856 | 1.410649 | 0.000236 | 14.6384  | 0.268385 |
| Mifood blends 2019 6 | 2910-1 | 5.302479 | 49.89468 | 10.71177 | 4.813484 | 13.46077 | 8.264056 | 32.19544 | 2.571836 | 9.72E-05 | 6.971702 | 0.28516  |
| Mifood blends 2019 6 | 2910-2 | 5.238626 | 48.2297  | 10.55184 | 4.858512 | 14.10791 | 8.515671 | 33.00674 | 2.645304 | 0.000225 | 7.240198 | 0.289877 |
| Mifood blends 2019 6 | 2910-3 | 5.153229 | 47.12283 | 10.66315 | 4.692166 | 13.5828  | 8.622869 | 32.80399 | 2.700363 | 0.000155 | 7.065725 | 0.26755  |
| Mifood blends 2019 7 | 2911-1 | 1.634026 | 18.75415 | 3.353101 | 1.998876 | 3.598547 | 1.922971 | 6.93281  | 0.754145 | 5.226247 | 3.288244 | 0.135418 |
| Mifood blends 2019 7 | 2911-2 | 1.69897  | 19.09186 | 3.055355 | 2.086684 | 3.572007 | 1.743332 | 6.955683 | 0.654453 | 5.532709 | 3.293329 | 0.12645  |
| Mifood blends 2019 7 | 2911-3 | 1.509714 | 17.48071 | 2.708462 | 1.891977 | 3.297314 | 1.542005 | 6.806828 | 0.62001  | 5.016554 | 3.235585 | 0.120632 |
| thee                 | 2904-1 | 0.068659 | 0.557801 | 23.25638 | 0.008065 | 366.8658 | 58.07141 | 5.731364 | 84.16012 | 0.005114 | 18.37257 | 0.014045 |
| thee                 | 2904-2 | 0.043554 | 0.273924 | 22.48881 | 0.004299 | 358.1672 | 57.36741 | 5.891049 | 83.74353 | 0.001218 | 18.17909 | 0.023075 |



|                               |                  |                                |                             |                 |                             |                                   |                    |                         |                            |                     |                              |                    |
|-------------------------------|------------------|--------------------------------|-----------------------------|-----------------|-----------------------------|-----------------------------------|--------------------|-------------------------|----------------------------|---------------------|------------------------------|--------------------|
| thee                          | 2904-3           | 0.037359                       | 0.221915                    | 23.03374        | 0.003771                    | 366.4723                          | 57.38584           | 5.826125                | 85.54436                   | 0.020221            | 18.57579                     | 0.021502           |
|                               |                  |                                |                             |                 |                             |                                   |                    |                         |                            |                     |                              |                    |
| t 1 month                     |                  |                                |                             |                 |                             |                                   |                    |                         |                            |                     |                              |                    |
|                               |                  | [mg/kg]                        |                             |                 |                             |                                   |                    |                         |                            |                     |                              |                    |
| <b>Naam</b>                   | <b>BL-nummer</b> | <b>Delphinidin-3-glucoside</b> | <b>Cyanidin-3-glucoside</b> | <b>Catechin</b> | <b>Peonidin-3-glucoside</b> | <b>Epigallocatechin-3-gallate</b> | <b>Epicatechin</b> | <b>Chlorogenic acid</b> | <b>Epicatechin gallate</b> | <b>Sulforaphane</b> | <b>Quercetin-3-glucoside</b> | <b>Resveratrol</b> |
| Pas-v 1                       | BL-2951-1        | 6.510                          | 56.277                      | 0.698           | 2.565                       | 2.356                             | 2.603              | 7.641                   | 1.721                      | 2.497               | 6.818                        | 0.048              |
| Pas-v 1                       | BL-2951-2        | 4.361                          | 40.741                      | 0.534           | 1.978                       | 2.064                             | 2.156              | 6.472                   | 1.368                      | 2.017               | 5.231                        | 0.020              |
| Pas-v 1                       | BL-2951-3        | 5.611                          | 51.056                      | 0.661           | 2.407                       | 2.227                             | 2.544              | 7.139                   | 1.640                      | 2.316               | 6.495                        | 0.039              |
| o-v 1                         | BL-2943-1        | 6.295                          | 51.197                      | 0.974           | 2.126                       | 3.001                             | 4.285              | 12.304                  | 1.642                      | 2.327               | 6.248                        | 0.071              |
| o-v 1                         | BL-2943-2        | 6.282                          | 52.596                      | 1.025           | 2.531                       | 3.217                             | 4.846              | 13.199                  | 1.878                      | 2.397               | 6.253                        | 0.043              |
| o-v 1                         | BL-2943-3        | 5.581                          | 42.833                      | 0.912           | 2.270                       | 2.869                             | 4.181              | 12.322                  | 1.609                      | 2.344               | 5.958                        | 0.051              |
| Pst-v 1                       | BL-2939-1        | 3.435                          | 33.214                      | 1.336           | 1.478                       | 3.265                             | 7.943              | 17.177                  | 1.578                      | 1.634               | 4.735                        | 0.048              |
| Pst-v 1                       | BL-2939-2        | 4.095                          | 35.152                      | 1.440           | 1.695                       | 3.514                             | 8.755              | 18.219                  | 1.588                      | 1.771               | 5.076                        | 0.055              |
| Pst-v 1                       | BL-2939-3        | 3.750                          | 34.283                      | 1.347           | 1.530                       | 3.226                             | 7.743              | 17.287                  | 1.486                      | 1.545               | 4.867                        | 0.061              |
| ECP VFMX 100 - 400 06-07-22 3 | BL-3130-1        | 2.985                          | 47.367                      | 1.988           | 2.010                       | 5.001                             | 7.858              | 42.866                  | 2.821                      | 2.279               | 16.015                       | *                  |
| ECP VFMX 100 - 400 06-07-22 3 | BL-3130-2        | 3.283                          | 47.626                      | 1.864           | 1.880                       | 4.888                             | 6.672              | 38.011                  | 2.785                      | 1.944               | 14.704                       | *                  |
| ECP VFMX 100 - 400 06-07-22 3 | BL-3130-3        | 2.741                          | 42.847                      | 1.699           | 1.781                       | 4.132                             | 6.040              | 34.023                  | 2.224                      | 1.955               | 13.535                       | *                  |
|                               |                  |                                |                             |                 |                             |                                   |                    |                         |                            |                     |                              |                    |
| t 6 month                     |                  |                                |                             |                 |                             |                                   |                    |                         |                            |                     |                              |                    |
|                               |                  |                                |                             |                 |                             |                                   |                    |                         |                            |                     |                              |                    |
| <b>Naam</b>                   | <b>BL-nummer</b> | <b>Delphinidin-3-glucoside</b> | <b>Cyanidin-3-glucoside</b> | <b>Catechin</b> | <b>Peonidin-3-glucoside</b> | <b>Epigallocatechin-3-gallate</b> | <b>Epicatechin</b> | <b>Chlorogenic acid</b> | <b>Epicatechin gallate</b> | <b>Sulforaphane</b> | <b>Quercetin-3-glucoside</b> | <b>Resveratrol</b> |
| Pst-v-3                       | BL-2022-2941-1   | 1.99                           | 13.67                       | 0.83            | 0.66                        | 3.72                              | 3.64               | 15.96                   | 1.14                       | 0.80                | 4.73                         | 0.04               |
| Pst-v-3                       | BL-2022-2941-2   | 2.03                           | 15.72                       | 0.86            | 0.67                        | 3.91                              | 3.70               | 16.42                   | 1.16                       | 0.83                | 5.28                         | 0.05               |
| Pst-v-3                       | BL-2022-2941-3   | 2.15                           | 16.44                       | 0.89            | 0.63                        | 3.79                              | 3.55               | 15.84                   | 1.19                       | 0.75                | 4.52                         | 0.04               |
| O-v-3                         | BL-2022-2945-1   | 1.48                           | 17.99                       | 0.35            | 0.78                        | 1.54                              | 1.10               | 5.10                    | 0.79                       | 0.92                | 4.63                         | 0.02               |

|                      |                |      |       |      |      |      |      |       |      |      |       |      |
|----------------------|----------------|------|-------|------|------|------|------|-------|------|------|-------|------|
| O-v-3                | BL-2022-2945-2 | 1.56 | 19.55 | 0.40 | 0.89 | 1.52 | 1.15 | 5.44  | 0.83 | 1.04 | 4.74  | 0.02 |
| O-v-3                | BL-2022-2945-3 | 1.51 | 18.41 | 0.32 | 0.77 | 1.37 | 0.93 | 4.55  | 0.81 | 0.94 | 5.07  | 0.03 |
| Pas-v-3              | BL-2022-2953-1 | 1.27 | 17.78 | 0.29 | 0.80 | 1.03 | 0.87 | 2.62  | 0.74 | 0.97 | 5.04  | 0.01 |
| Pas-v-3              | BL-2022-2953-2 | 0.89 | 14.38 | 0.27 | 0.64 | 0.81 | 0.79 | 2.14  | 0.59 | 0.88 | 4.51  | 0.02 |
| Pas-v-3              | BL-2022-2953-3 | 1.19 | 17.52 | 0.33 | 0.78 | 1.10 | 0.94 | 2.71  | 0.76 | 0.96 | 5.48  | 0.00 |
| ECP- VFMX 06-07-22 2 | BL-2022-3129-1 | 1.80 | 6.79  | 0.63 | 0.26 | 4.07 | 1.52 | 28.53 | 1.43 | 0.59 | 12.55 | 0.08 |
| ECP- VFMX 06-07-22 2 | BL-2022-3129-2 | 1.34 | 6.10  | 0.65 | 0.27 | 4.01 | 1.73 | 27.98 | 1.47 | 0.60 | 12.06 | 0.06 |
| ECP- VFMX 06-07-22 2 | BL-2022-3129-3 | 1.31 | 5.60  | 0.57 | 0.23 | 3.77 | 1.41 | 24.38 | 1.26 | 0.54 | 11.85 | 0.12 |

[illegible]

[illegible]

[illegible]

[illegible]

|                      |                |          |          |          |          |          |          |          |          |          |          |          |
|----------------------|----------------|----------|----------|----------|----------|----------|----------|----------|----------|----------|----------|----------|
| Pas-v-3              | BL-2022-2953-1 | 17.71378 | 11.42049 | 8.984161 | 11.92709 | 15.35746 | 8.694471 | 12.26907 | 13.17322 | 4.976667 | 9.709338 | 85.06079 |
| Pas-v-3              | BL-2022-2953-2 |          |          |          |          |          |          |          |          |          |          |          |
| Pas-v-3              | BL-2022-2953-3 |          |          |          |          |          |          |          |          |          |          |          |
| ECP- VFMX 06-07-22 2 | BL-2022-3129-1 | 18.71941 | 9.773372 | 6.470998 | 8.65833  | 4.068466 | 10.46936 | 8.365133 | 8.078934 | 5.855386 | 2.969671 | 36.61015 |
| ECP- VFMX 06-07-22 2 | BL-2022-3129-2 |          |          |          |          |          |          |          |          |          |          |          |
| ECP- VFMX 06-07-22 2 | BL-2022-3129-3 |          |          |          |          |          |          |          |          |          |          |          |

B: Vitamin C Measurements and RSD

| Naam                          | BL-nummer      | Concentration [mg/kg] | average     | RSD       |
|-------------------------------|----------------|-----------------------|-------------|-----------|
| ECP VFMX 100 - 400 06-07-22 1 | BL-2022-3128-1 | #VALUE!               | #VALUE!     | #VALUE!   |
| ECP VFMX 100 - 400 06-07-22 1 | BL-2022-3128-2 | #VALUE!               |             |           |
| Tomaat                        | BL-2022-4493-1 | 288.9834351           | 291.3527905 | 1.1500746 |
| Tomaat                        | BL-2022-4493-2 | 293.7221458           |             |           |
| Bloemkool                     | BL-2022-4494-1 | 219.0262187           | 204.1178323 | 10.329153 |
| Bloemkool                     | BL-2022-4494-2 | 189.2094459           |             |           |
| Blauwe bes                    | BL-2022-4495-1 | 16.63693443           | 17.16372211 | 4.3404937 |
| Blauwe bes                    | BL-2022-4495-2 | 17.69050978           |             |           |
| Framboos                      | BL-2022-4496-1 | 198.5954354           | 197.785225  | 0.5793205 |
| Framboos                      | BL-2022-4496-2 | 196.9750147           |             |           |
| Rode paprika                  | BL-2022-4497-1 | 1092.284726           | 1090.313592 | 0.2556699 |
| Rode paprika                  | BL-2022-4497-2 | 1088.342459           |             |           |
| Appel                         | BL-2022-4498-1 | 40.41510956           | 41.30216555 | 3.0373386 |
| Appel                         | BL-2022-4498-2 | 42.18922154           |             |           |
| Wortel                        | BL-2022-4499-1 | 23.31873454           | 21.48664722 | 12.058478 |
| Wortel                        | BL-2022-4499-2 | 19.65455991           |             |           |

| Broccoli                      | BL-2022-4500-1 | 529.7972714      | 500.6651109 | 8.2288731 |
|-------------------------------|----------------|------------------|-------------|-----------|
| Broccoli                      | BL-2022-4500-2 | 471.5329504      |             |           |
| Braam                         | BL-2022-4501-1 | 42.76776835      | 43.33491508 | 1.8508554 |
| Braam                         | BL-2022-4501-2 | 43.90206181      |             |           |
| Thee                          | BL-2022-4502-1 | #VALUE!          | #VALUE!     | #VALUE!   |
| Thee                          | BL-2022-4502-2 | #VALUE!          |             |           |
| Blauwe druif                  | BL-2022-4503-1 | 19.92029851      | 19.62691797 | 2.1139475 |
| Blauwe druif                  | BL-2022-4503-2 | 19.33353744      |             |           |
| Spruit                        | BL-2022-4504-1 | 569.4562978      | 551.1714081 | 4.6915966 |
| Spruit                        | BL-2022-4504-2 | 532.8865183      |             |           |
| Pasc-k                        | BL-2022-4573-1 | 84.10812907      | 83.918188   | 0.3200942 |
| Pasc-k                        | BL-2022-4573-2 | 83.72824692      |             |           |
| Pasc-v                        | BL-2022-4574-1 | 129.8132394      | 129.9350831 | 0.1326147 |
| Pasc-v                        | BL-2022-4574-2 | 130.0569268      |             |           |
| O-k                           | BL-2022-4575-1 | 79.35471265      | 84.2063742  | 8.1481784 |
| O-k                           | BL-2022-4575-2 | 89.05803574      |             |           |
| O-v                           | BL-2022-4576-1 | 143.4880627      | 143.3728058 | 0.1136881 |
| O-v                           | BL-2022-4576-2 | 143.2575489      |             |           |
| Pasteur-k                     | BL-2022-4577-1 | 51.06788074      | 51.34569727 | 0.7651895 |
| Pasteur-k                     | BL-2022-4577-2 | 51.6235138       |             |           |
| Pasteur-v                     | BL-2022-4578-1 | 70.47004468      | 66.30334285 | 8.8873441 |
| Pasteur-v                     | BL-2022-4578-2 | 62.13664101      |             |           |
|                               |                |                  |             |           |
| t1 month                      |                |                  |             |           |
|                               |                |                  |             |           |
| Naam                          | BL-nummer      | L- ascorbic acid | average     | RSD       |
| ECP VFMX 100 - 400 06-07-22 1 | BL-2022-3128-1 |                  | #DIV/0!     | #DIV/0!   |
| ECP VFMX 100 - 400 06-07-22 1 | BL-2022-3128-2 |                  |             |           |
| Pas-v                         | BL-2022-2951-1 | 70.537           | 72.595      | 4.009     |
| Pas-v                         | BL-2022-2951-2 | 74.653           |             |           |
| O-v                           | BL-2022-2943-1 |                  | #DIV/0!     | #DIV/0!   |
| O-v                           | BL-2022-2943-2 |                  |             |           |



|                      |                  |                         |         |           |
|----------------------|------------------|-------------------------|---------|-----------|
| Pst-v                | BL-2022-2939-1   | 0                       | 0.000   | #DIV/0!   |
| Pst-v                | BL-2022-2939-2   | 0                       |         |           |
|                      |                  |                         |         |           |
| t6 month             |                  |                         |         |           |
|                      |                  | [mg/kg]                 |         |           |
| <b>Naam</b>          | <b>BL-nummer</b> | <b>L- ascorbic acid</b> | average | RSD       |
| Pst-v-3              | BL-2022-2941-1   | 18.3                    | 18.3    | 1.6475254 |
| Pst-v-3              | BL-2022-2941-2   | 18.1                    |         |           |
| Pst-v-3              | BL-2022-2941-3   | 18.7                    |         |           |
| O-v-3                | BL-2022-2945-1   | 56.5                    | 56.7    | 0.3581227 |
| O-v-3                | BL-2022-2945-2   | 56.9                    |         |           |
| O-v-3                | BL-2022-2945-3   | 56.6                    |         |           |
| Pas-v-3              | BL-2022-2953-1   | 44.8                    | 45.0    | 0.5177849 |
| Pas-v-3              | BL-2022-2953-2   | 45.2                    |         |           |
| Pas-v-3              | BL-2022-2953-3   | 45.1                    |         |           |
| ECP- VFMX 06-07-22 2 | BL-2022-3129-1   | -                       | #DIV/0! | #DIV/0!   |
| ECP- VFMX 06-07-22 2 | BL-2022-3129-2   | -                       |         |           |
| ECP- VFMX 06-07-22 2 | BL-2022-3129-3   | -                       |         |           |
|                      |                  |                         |         |           |
| t1 month             |                  | [mg/kg]                 |         |           |
| <b>Naam</b>          | <b>BL-nummer</b> | <b>L- ascorbic acid</b> | average | RSD       |
| Bloemkool            | BL-2022-2900-1   | 274.084                 | 256.0   | 6.1283688 |
| Bloemkool            | BL-2022-2900-2   | 247.787                 |         |           |
| Bloemkool            | BL-2022-2900-3   | 246.112                 |         |           |
| Spruiten             | BL-2022-2893-1   | 528.934                 | 493.3   | 10.335725 |
| Spruiten             | BL-2022-2893-2   | 516.100                 |         |           |
| Spruiten             | BL-2022-2893-3   | 434.906                 |         |           |
| Tomaat               | BL-2022-2896-1   | 125.285                 | 160.8   | 23.16411  |
| Tomaat               | BL-2022-2896-2   | 157.441                 |         |           |
| Tomaat               | BL-2022-2896-3   | 199.539                 |         |           |
| Wortel               | BL-2022-2903-1   | 18.041                  | 17.3    | 10.188985 |

|                      |                |             |             |           |
|----------------------|----------------|-------------|-------------|-----------|
| Wortel               | BL-2022-2903-2 | 15.333      |             |           |
| Wortel               | BL-2022-2903-3 | 18.654      |             |           |
| Paprika              | BL-2022-2902-1 | 804.446     | 874.2       | 14.773864 |
| Paprika              | BL-2022-2902-2 | 794.981     |             |           |
| Paprika              | BL-2022-2902-3 | 1023.272    |             |           |
| ECP naturel 1        | BL-2022-3126-1 | *           | #DIV/0!     | #DIV/0!   |
| ECP naturel 1        | BL-2022-3126-2 | *           |             |           |
| ECP naturel 1        | BL-2022-3126-3 | *           |             |           |
| Thee                 | BL-2022-2904-1 | *           | #DIV/0!     | #DIV/0!   |
| Thee                 | BL-2022-2904-2 | *           |             |           |
| Thee                 | BL-2022-2904-3 | *           |             |           |
| Mifood blends 2019 1 | BL-2022-2905-1 | 1.045       | 0.9         | 17.533965 |
| Mifood blends 2019 1 | BL-2022-2905-2 | 0.743       |             |           |
| Mifood blends 2019 1 | BL-2022-2905-3 | 0.843       |             |           |
| Mifood blends 2019 2 | BL-2022-2906-1 | 0.793       | 0.8         | 9.1977885 |
| Mifood blends 2019 2 | BL-2022-2906-2 | 0.805       |             |           |
| Mifood blends 2019 2 | BL-2022-2906-3 | 0.933       |             |           |
| Mifood blends 2019 3 | BL-2022-2907-1 | 88.585      | 89.1        | 0.8112303 |
| Mifood blends 2019 3 | BL-2022-2907-2 | 89.909      |             |           |
| Mifood blends 2019 3 | BL-2022-2907-3 | 88.745      |             |           |
| Mifood blends 2019 4 | BL-2022-2908-1 | *           | #DIV/0!     | #DIV/0!   |
| Mifood blends 2019 4 | BL-2022-2908-2 | *           |             |           |
| Mifood blends 2019 4 | BL-2022-2908-3 | *           |             |           |
| Mifood blends 2019 5 | BL-2022-2909-1 | 0.923       | 0.8         | 16.592852 |
| Mifood blends 2019 5 | BL-2022-2909-2 | 0.796       |             |           |
| Mifood blends 2019 5 | BL-2022-2909-3 | 0.660       |             |           |
| Mifood blends 2019 6 | BL-2022-2910-1 | 1.807       | 1.8         | 1.9149749 |
| Mifood blends 2019 6 | BL-2022-2910-2 | 1.746       |             |           |
| Mifood blends 2019 6 | BL-2022-2910-3 | 1.804       |             |           |
| Mifood blends 2019 7 | BL-2022-2911-1 | 1.549       | 1.5         | 3.285027  |
| Mifood blends 2019 7 | BL-2022-2911-2 | 1.456       |             |           |
| Mifood blends 2019 7 | BL-2022-2911-3 | 1.532       |             |           |
| Druiven              | BL-2894-1      | 36.66259969 | 36.98064732 | 1.2162774 |

|                               |                  |                         |             |           |
|-------------------------------|------------------|-------------------------|-------------|-----------|
| Druiven                       | BL-2894-2        | 37.29869495             |             |           |
| Broccoli                      | BL-2897-1        | 480.4270554             | 500.0405846 | 5.5470936 |
| Broccoli                      | BL-2897-2        | 519.6541138             |             |           |
| Pas v.1                       | BL-2951-1        | 70.53674767             | 72.5946643  | 4.0090186 |
| Pas v.1                       | BL-2951-2        | 74.65258092             |             |           |
| ECP VFMX 100 - 400 06-07-22 3 | BL-3130-1        | #VALUE!                 | #VALUE!     | #VALUE!   |
| ECP VFMX 100 - 400 06-07-22 3 | BL-3130-2        | #VALUE!                 |             |           |
| Pst-v 1                       | BL-2022-2939-1   | 13.790                  | 13.2        | 6.2105877 |
| Pst-v 1                       | BL-2022-2939-2   | 12.260                  |             |           |
| Pst-v 1                       | BL-2022-2939-3   | 13.532                  |             |           |
| o-v 1                         | BL-2022-2943-1   | 79.433                  | 81.2        | 2.0888705 |
| o-v 1                         | BL-2022-2943-2   | 82.822                  |             |           |
| o-v 1                         | BL-2022-2943-3   | 81.207                  |             |           |
| bramen                        | BL-2022-2899-1   | 69.459                  | 71.9        | 3.2321822 |
| bramen                        | BL-2022-2899-2   | 72.025                  |             |           |
| bramen                        | BL-2022-2899-3   | 74.095                  |             |           |
| appel                         | BL-2022-2895-1   | 57.479                  | 68.8        | 21.521363 |
| appel                         | BL-2022-2895-2   | 63.323                  |             |           |
| appel                         | BL-2022-2895-3   | 85.535                  |             |           |
| blauwe bessen                 | BL-2022-2901-1   | 2.305                   | 2.2         | 7.5058846 |
| blauwe bessen                 | BL-2022-2901-2   | 2.251                   |             |           |
| blauwe bessen                 | BL-2022-2901-3   | 1.998                   |             |           |
| framboos                      | BL-2022-2898-1   | 223.378                 | 216.7       | 3.0661074 |
| framboos                      | BL-2022-2898-2   | 210.095                 |             |           |
| framboos                      | BL-2022-2898-3   | 216.496                 |             |           |
|                               |                  |                         |             |           |
| t6 month                      |                  |                         |             |           |
|                               |                  | [mg/kg]                 |             |           |
| <b>Naam</b>                   | <b>BL-nummer</b> | <b>L- ascorbic acid</b> | average     | RSD       |
| Pst-v-3                       | BL-2022-2941-1   | 18.3                    | 18.3        | 1.6475254 |
| Pst-v-3                       | BL-2022-2941-2   | 18.1                    |             |           |
| Pst-v-3                       | BL-2022-2941-3   | 18.7                    |             |           |



|                               |        |          |          |          |          |             |          |          |          |
|-------------------------------|--------|----------|----------|----------|----------|-------------|----------|----------|----------|
| ECP naturel 1                 | 3126-2 | #VALUE!  | #VALUE!  | #VALUE!  | #VALUE!  |             |          |          |          |
| ECP naturel 1                 | 3126-3 | #VALUE!  | #VALUE!  | #VALUE!  | #VALUE!  |             |          |          |          |
| ECP VFMX 100 - 400 06-07-22 1 | 3128-1 | #VALUE!  | #VALUE!  | 2.755734 | 7.387646 | #VALUE!     | #VALUE!  | 64.51332 | 32.84797 |
| ECP VFMX 100 - 400 06-07-22 1 | 3128-2 | #VALUE!  | #VALUE!  | 2.666077 | 10.58685 |             |          |          |          |
| ECP VFMX 100 - 400 06-07-22 1 | 3128-3 | #VALUE!  | #VALUE!  | 7.537034 | 14.48423 |             |          |          |          |
| ECP VFMX 100 - 400 06-07-22 3 | 3130-1 | #VALUE!  | #VALUE!  | 4.446816 | 9.163343 | #VALUE!     | #VALUE!  | 25.36575 | 27.41574 |
| ECP VFMX 100 - 400 06-07-22 3 | 3130-2 | #VALUE!  | #VALUE!  | 6.863538 | 15.6249  |             |          |          |          |
| ECP VFMX 100 - 400 06-07-22 3 | 3130-3 | #VALUE!  | #VALUE!  | 4.623333 | 11.27053 |             |          |          |          |
| Mifood blends 2019 3          | 2907-1 | 2.155622 | 2.788301 | 4.918638 | 18.06062 | 30.93103062 | 1.590067 | 5.099228 | 4.415448 |
| Mifood blends 2019 3          | 2907-2 | 1.489381 | 2.810323 | 5.437172 | 19.42012 |             |          |          |          |
| Mifood blends 2019 3          | 2907-3 | 1.182058 | 2.725314 | 5.1038   | 19.5953  |             |          |          |          |
| Mifood blends 2019 4          | 2908-1 | 3.336246 | #VALUE!  | #VALUE!  | 1.076262 | 14.56208814 | #VALUE!  | #VALUE!  | 6.295846 |
| Mifood blends 2019 4          | 2908-2 | 4.344064 | #VALUE!  | #VALUE!  | 1.134233 |             |          |          |          |
| Mifood blends 2019 4          | 2908-3 | 3.492812 | #VALUE!  | #VALUE!  | 1.219365 |             |          |          |          |
| Mifood blends 2019 6          | 2910-1 | #VALUE!  | 3.1172   | 3.939569 | 14.21162 | #VALUE!     | 37.87004 | 33.67521 | 32.77237 |
| Mifood blends 2019 6          | 2910-2 | #VALUE!  | 1.382088 | 2.007562 | 7.296697 |             |          |          |          |
| Mifood blends 2019 6          | 2910-3 | #VALUE!  | 2.41466  | 2.741215 | 10.25236 |             |          |          |          |
| Mifood blends 2019 7          | 2911-1 | 2.770812 | 1.701984 | 2.341087 | 8.58202  | 9.519257269 | 9.620009 | 17.80019 | 4.791667 |
| Mifood blends 2019 7          | 2911-2 | 2.459719 | 1.537788 | 1.647685 | 7.82433  |             |          |          |          |
| Mifood blends 2019 7          | 2911-3 | 2.977057 | 1.404661 | 2.205713 | 8.039489 |             |          |          |          |
| Bloemkool                     | 2900-1 | #VALUE!  | #VALUE!  | #VALUE!  | #VALUE!  | #VALUE!     | #VALUE!  | #VALUE!  | #VALUE!  |
| Bloemkool                     | 2900-2 | #VALUE!  | #VALUE!  | #VALUE!  | #VALUE!  |             |          |          |          |
| Bloemkool                     | 2900-3 | #VALUE!  | #VALUE!  | #VALUE!  | #VALUE!  |             |          |          |          |
| Spruiten                      | 2893-1 | 5.868934 | #VALUE!  | #VALUE!  | #VALUE!  | 18.36154089 | #VALUE!  | #VALUE!  | #VALUE!  |
| Spruiten                      | 2893-2 | 7.928773 | #VALUE!  | #VALUE!  | #VALUE!  |             |          |          |          |
| Spruiten                      | 2893-3 | 5.828127 | #VALUE!  | #VALUE!  | #VALUE!  |             |          |          |          |
| Tomaat                        | 2896-1 | 2.426727 | 5.421946 | #VALUE!  | 2.747887 | 5.051908915 | 11.3831  | #VALUE!  | 4.135777 |
| Tomaat                        | 2896-2 | 2.466131 | 6.415905 | #VALUE!  | 2.660093 |             |          |          |          |
| Tomaat                        | 2896-3 | 2.664189 | 6.789367 | #VALUE!  | 2.530356 |             |          |          |          |
| Broccoli                      | 2897-1 | 13.69486 | #VALUE!  | #VALUE!  | 0.538146 | 28.40847997 | #VALUE!  | #VALUE!  | 28.21353 |
| Broccoli                      | 2897-2 | 11.48693 | #VALUE!  | #VALUE!  | 0.82624  |             |          |          |          |

|                               |                  |                |              |                      |               |                |              |                      |               |
|-------------------------------|------------------|----------------|--------------|----------------------|---------------|----------------|--------------|----------------------|---------------|
| Broccoli                      | 2897-3           | 7.570767       | #VALUE!      | #VALUE!              | 0.968911      |                |              |                      |               |
| Wortel                        | 2903-1           | 3.704258       | #VALUE!      | 15.08299             | 31.8984       | 36.86466356    | #VALUE!      | 39.33471             | 39.64366      |
| Wortel                        | 2903-2           | 2.308961       | #VALUE!      | 6.493668             | 13.55699      |                |              |                      |               |
| Wortel                        | 2903-3           | 5.020194       | #VALUE!      | 13.85874             | 28.72506      |                |              |                      |               |
| Paprika                       | 2902-1           | 3.190667       | #VALUE!      | #VALUE!              | 1.608821      | 14.63246495    | #VALUE!      | #VALUE!              | 15.10596      |
| Paprika                       | 2902-2           | 3.555231       | #VALUE!      | #VALUE!              | 1.54606       |                |              |                      |               |
| Paprika                       | 2902-3           | 4.246254       | #VALUE!      | #VALUE!              | 1.201417      |                |              |                      |               |
| T= 1 maand                    |                  |                |              |                      |               |                |              |                      |               |
|                               | rc               | mg/kg          |              |                      |               | RSD (%)        |              |                      |               |
| <b>Naam</b>                   | <b>BL-nummer</b> | <b>luteine</b> | <b>lyco</b>  | <b>a-car</b>         | <b>B-car</b>  | <b>luteine</b> | <b>lyco</b>  | <b>a-car</b>         | <b>B-car</b>  |
| Pas-v 1                       | BL-2951-1        | 1.379509       | 2.007839     | 3.856197             | 13.37199      | 29.56846106    | 4.798909     | 6.765621             | 3.85979       |
| Pas-v 1                       | BL-2951-2        | 2.04688        | 1.872342     | 3.588988             | 12.90814      |                |              |                      |               |
| Pas-v 1                       | BL-2951-3        | 1.179964       | 1.833817     | 3.369193             | 12.37798      |                |              |                      |               |
| o-v 1                         | BL-2943-1        | 1.402949       | 2.148094     | 4.057681             | 14.03312      | 31.88205483    | 13.04105     | 9.688155             | 6.626883      |
| o-v 1                         | BL-2943-2        | 1.887068       | 2.304978     | 3.987949             | 14.67306      |                |              |                      |               |
| o-v 1                         | BL-2943-3        | 2.656016       | 1.777524     | 3.386236             | 12.86235      |                |              |                      |               |
| Pst-v 1                       | BL-2939-1        | 2.128907       | 2.082273     | 4.899648             | 17.83091      | 25.51151399    | 12.00246     | 4.232806             | 2.623595      |
| Pst-v 1                       | BL-2939-2        | 2.162081       | 2.582435     | 5.332616             | 18.78525      |                |              |                      |               |
| Pst-v 1                       | BL-2939-3        | 3.256849       | 2.587128     | 5.138612             | 18.41677      |                |              |                      |               |
| ECP VFMX 100 - 400 06-07-22 3 | BL-3130-1        | #VALUE!        | #VALUE!      | 4.443354             | 13.13518      | #VALUE!        | #VALUE!      | 6.043872             | 1.516627      |
| ECP VFMX 100 - 400 06-07-22 3 | BL-3130-2        | #VALUE!        | #VALUE!      | 4.846106             | 13.12778      |                |              |                      |               |
| ECP VFMX 100 - 400 06-07-22 3 | BL-3130-3        | #VALUE!        | #VALUE!      | 4.322328             | 12.78959      |                |              |                      |               |
|                               |                  |                |              |                      |               |                |              |                      |               |
|                               |                  |                |              |                      |               |                |              |                      |               |
| t 6 month                     |                  | c. (mg/kg)     |              |                      |               | rsd %          |              |                      |               |
| <b>Naam</b>                   | <b>BL-nummer</b> | <b>B-car</b>   | <b>a-car</b> | <b>lycopen<br/>e</b> | <b>lutein</b> | <b>B-car</b>   | <b>a-car</b> | <b>lycopen<br/>e</b> | <b>lutein</b> |
| Pst-v-3                       | BL-2022-2941-1   | 15.17          | 5.14         | 5.25                 | 3.19          | 3.615431989    | 2.526566     | 5.315825             | 2.130267      |
| Pst-v-3                       | BL-2022-2941-2   | 15.13          | 4.90         | 5.49                 | 3.29          |                |              |                      |               |
| Pst-v-3                       | BL-2022-2941-3   | 14.22          | 4.95         | 4.93                 | 3.16          |                |              |                      |               |
| O-v-3                         | BL-2022-2945-1   | 12.38          | 4.56         | 4.26                 | 2.94          | 3.757179639    | 3.224336     | 4.968803             | 2.032296      |
| O-v-3                         | BL-2022-2945-2   | 11.58          | 4.71         | 3.89                 | 3.06          |                |              |                      |               |

|                      |                |       |      |         |         |             |          |          |          |
|----------------------|----------------|-------|------|---------|---------|-------------|----------|----------|----------|
| O-v-3                | BL-2022-2945-3 | 11.63 | 4.42 | 3.95    | 3.02    |             |          |          |          |
| Pas-v-3              | BL-2022-2953-1 | 10.86 | 4.31 | 3.69    | 2.78    | 9.260186575 | 7.85611  | 11.20139 | 1.680676 |
| Pas-v-3              | BL-2022-2953-2 | 9.14  | 3.70 | 2.96    | 2.85    |             |          |          |          |
| Pas-v-3              | BL-2022-2953-3 | 9.48  | 3.88 | 3.25    | 2.76    |             |          |          |          |
| ECP- VFMX 06-07-22 2 | BL-2022-3129-1 | 5.52  | 2.14 | #VALUE! | #VALUE! | 50.85831363 | 46.10885 | #VALUE!  | #VALUE!  |
| ECP- VFMX 06-07-22 2 | BL-2022-3129-2 | 2.50  | 0.92 | #VALUE! | #VALUE! |             |          |          |          |
| ECP- VFMX 06-07-22 2 | BL-2022-3129-3 | 2.42  | 1.15 | #VALUE! | #VALUE! |             |          |          |          |
